# Supplementary material for: Keratin14 mRNA expression in human pneumocytes during quiescence, repair and disease
Source: PubMed Central journal article supplement (PMC5310884; doi:10.1371/journal.pone.0172130), 2017-02-15
Supplement: pone.0172130.s001.pdf [file pone.0172130.s001.pdf]

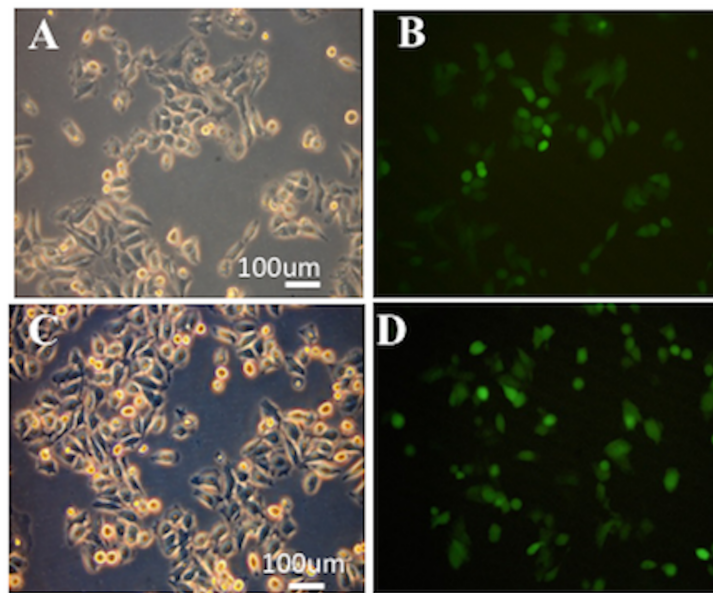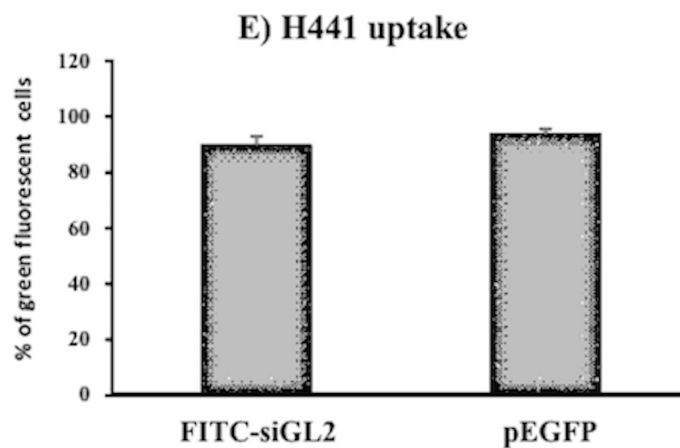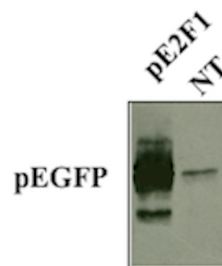

**Transfection efficiency FITC-labelled siRNA GL2 and of pEGFP.** At the end of transfection by FITC-labeled siGL2 (220 nM), FITC labelled cells were photographed (A-B) and the amount (E) quantified by flow cytometry (data are expressed as mean  $\pm$  SD, n = 4). 24 hours after transfection by pEGFP, EGFP labelled cells were photographed (C-D) and the amount (E) quantified by flow cytometry (data are expressed as mean  $\pm$  SD, n = 4). Overexpression of E2F1 by pE2F1 is shown by western blotting (F) in comparison to non transfected cells (NT).
